# Supplementary material for: Central Mediterranean rainfall varied with high northern latitude temperatures during the last deglaciation
Source: Springer Nature journal article supplement (doi:10.1038/s43247-022-00509-3), 2022-08-17
Supplement: MOESM1 [file 43247_2022_509_MOESM1_ESM.pdf]

## **Description of Additional Supplementary Files**

**File Name:** Supplementary Data 1

**Description:** U-Th dataset

**File Name:** Supplementary Data 2

**Description:** SA1- $\delta^{18}\text{O}$  original data
